# Supplementary material for: Extraordinary Multi-Organismal Interactions Involving Bacteriophages, Bacteria, Fungi, and Rotifers: Quadruple Microbial Trophic Network in Water Droplets
Source: PubMed Central journal article supplement (PMC7926626; doi:10.3390/ijms22042178), 2021-02-22
Supplement: ijms-22-02178-s001.pdf [file ijms-22-02178-s001.pdf]

**Table 1.** The activation of prophage induction process with mitomycin C. Differences in bacterial growth relative to the control experiments were marked as (+). The (-) symbol represents the lack of changes between samples not- and treated with prophage inductor. Each experiment was repeated three times.

| Bacteria                                                                        | Liquid TSB medium with mitomycin C (1 µg/ml) | TSA medium with 5% glycerol and sublethal concentration of appropriate antibiotic |                             |                          |
|---------------------------------------------------------------------------------|----------------------------------------------|-----------------------------------------------------------------------------------|-----------------------------|--------------------------|
|                                                                                 |                                              | Ampicillin (3.5 µg/ml)                                                            | Chloramphenicol (2.5 µg/ml) | Tetracycline (1.5 µg/ml) |
| <i>Tsukamurella tyrosinosolvens</i> DNA_1011                                    | +                                            | -                                                                                 | -                           | -                        |
| <i>Tsukamurella tyrosinosolvens</i> DNA_1017                                    | +                                            | +                                                                                 | +                           | +                        |
| <i>Tsukamurella tyrosinosolvens</i> DNA_1021                                    | +                                            | +                                                                                 | +                           | +                        |
| Mixture of <i>Bacillus</i> sp. DNA_1020 and <i>Stenotrophomonas maltophilia</i> | +                                            | +                                                                                 | +                           | +                        |
| <i>Achromobacter xylosoxidans</i> DNA_826                                       | +                                            | -                                                                                 | -                           | -                        |
| <i>Achromobacter xylosoxidans</i> DNA_1024                                      | -                                            | -                                                                                 | -                           | -                        |
| <i>Stenotrophomonas maltophilia</i> DNA_817                                     | -                                            | -                                                                                 | -                           | -                        |
| <i>Stenotrophomonas maltophilia</i> DNA_822                                     | -                                            | -                                                                                 | -                           | -                        |
| <i>Stenotrophomonas maltophilia</i> DNA_825                                     | -                                            | -                                                                                 | -                           | -                        |
| <i>Stenotrophomonas maltophilia</i> DNA_827                                     | -                                            | -                                                                                 | -                           | -                        |
| <i>Devosia insulae</i> DNA_1014                                                 | +                                            | +                                                                                 | +                           | +                        |
| <i>Aminobacter aminovorans</i> DNA_1012                                         | -                                            | -                                                                                 | -                           | -                        |
|                                                                                 | -                                            | -                                                                                 | -                           | -                        |

|                                                 |   |   |   |   |
|-------------------------------------------------|---|---|---|---|
| <i>Aminobacter aminovorans</i><br>DNA 1013      |   |   |   |   |
| <i>Aminobacter aminovorans</i><br>DNA 1022      | - | - | - | - |
| <i>Microbacterium</i> sp.<br>DNA 1007           | + | + | + | + |
| <i>Microbacterium</i> sp.<br>DNA 1016           | + | + | + | + |
| <i>Serratia/Aranicola</i><br>DNA 816            | + | - | + | - |
| <i>Serratia/Aranicola</i><br>DNA 823            | - | - | - | - |
| <i>Acidovorax delafieldii</i><br>DNA 811        | - | - | - | - |
| <i>Acidovorax delafieldii</i><br>DNA_812        | - | - | - | - |
| <i>Acidovorax delafieldii</i><br>DNA 814        | - | - | - | - |
| <i>Acidovorax delafieldii</i><br>DNA 815        | - | - | - | - |
| <i>Pseudomonas alcaligenes</i> DNA 813          | + | + | - | - |
| <i>Chryseobacterium daeguense</i> DNA 824       | + | - | + | - |
| <i>Paenibacillus cineris</i><br>DNA 1001        | + | - | + | - |
| <i>Paenibacillus pabuli</i><br>DNA 1002         | + | + | + | + |
| <i>Bosea/Starkeya</i><br>DNA 1003               | - | - | - | - |
| <i>Bosea vestrisii</i><br>DNA 1006              | - | + | + | + |
| <i>Bosea/Starkeya</i><br>DNA 1009               | - | - | - | - |
| <i>Ochrobactrum thiophenivorans</i><br>DNA 1015 | + | - | - | - |
| <i>Bacillus</i> sp. DNA_1023                    | - | - | - | - |
